# Supplementary material for: Causal associations between insulin-like growth factor 1 and vitamin D levels: a two-sample bidirectional Mendelian randomization study
Source: PubMed Central journal article supplement (PMC10229803; doi:10.3389/fnut.2023.1162442), 2023-05-17
Supplement: Presentation_1.pdf [file Presentation_1.pdf]

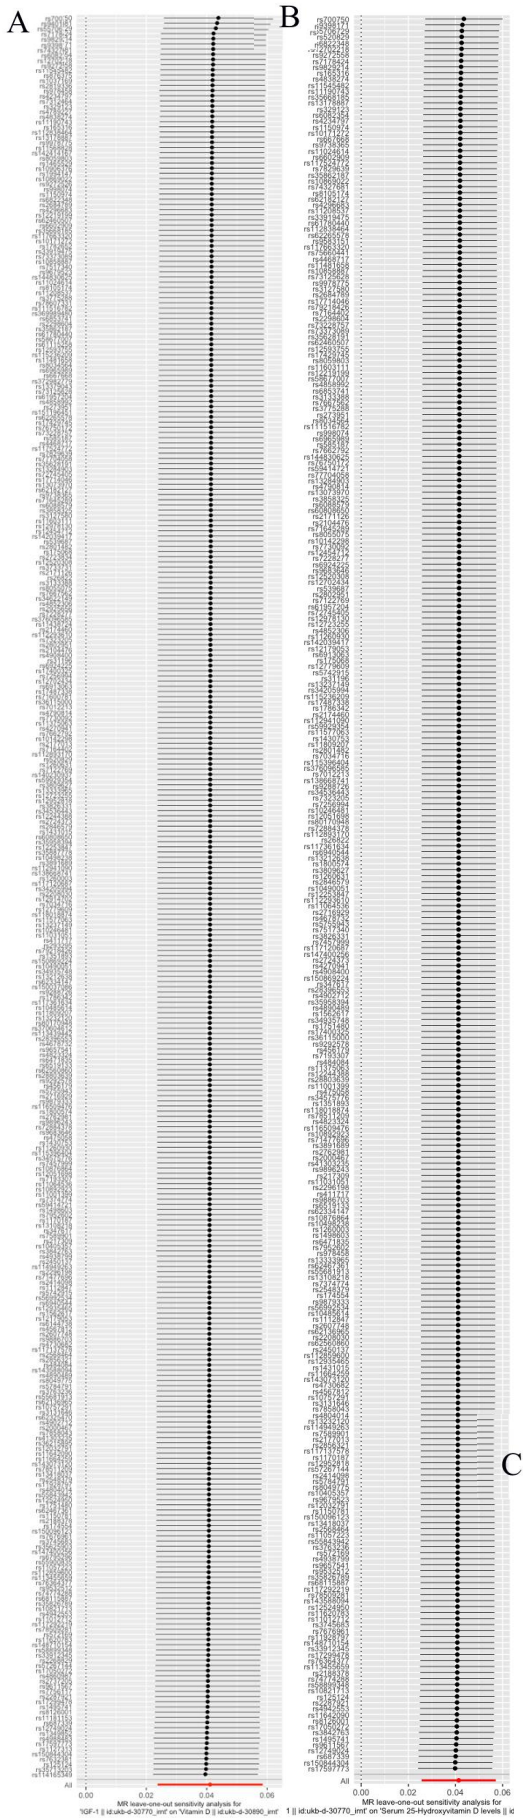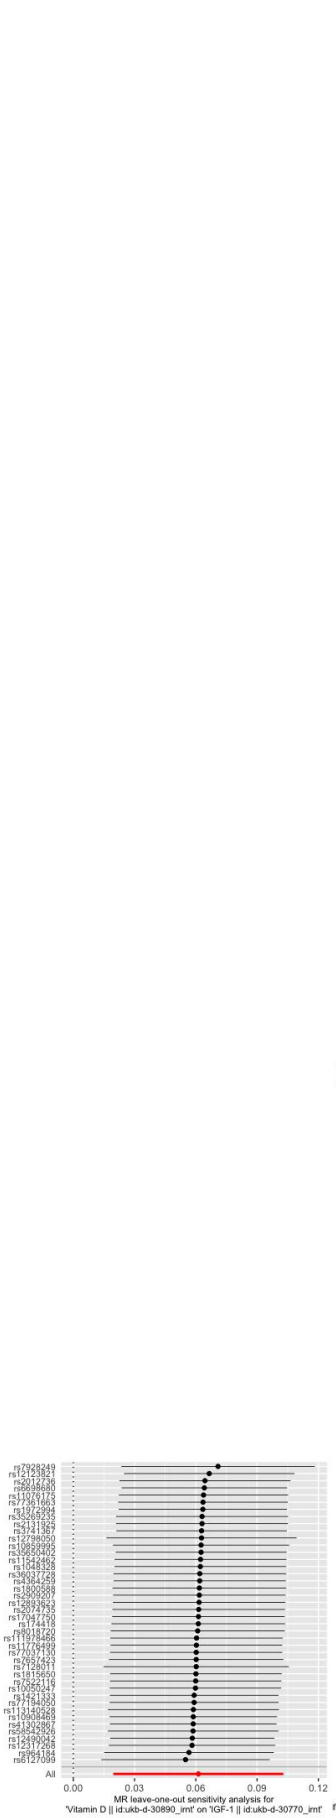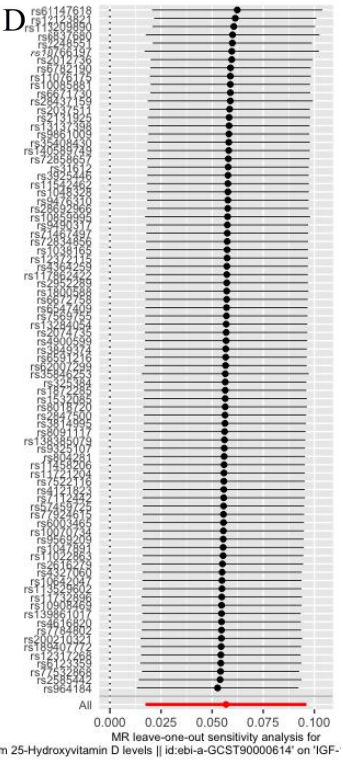

Supplement figure 1: MR leave-one-out showing the sensitivity analysis of exposure on outcome. (A) The effect of IGF-1 on vitamin D. (B) The effect of IGF-1 on 25-hydroxyvitamin D. (C) The effect of vitamin D on IGF-1. (D) The effect of 25-hydroxyvitamin D on IGF-1.
